# Supplementary material
Source: PubMed Central journal article supplement (PMC3545783)
Supplement: 1210457110_pnas.201210457SI.pdf [file 1210457110_pnas.201210457SI.pdf]

# Supporting Information

Amdursky et al. 10.1073/pnas.1210457110

## SI Text

**Thermally Activated vs. Temperature-Independent ETp in Az.** Thermally activated electron transport (ETp) via the deuterated azurin (Az) at  $\geq 180$  K (Fig. 3B, black squares) can be fitted to an Arrhenius equation [ $\propto \exp(-E_a/k_B T)$ ], with  $E_a = 85$  meV (8.2 kJ/mol). As shown previously (1),  $> \sim 180$  K ETp via protium-Az becomes thermally activated upon Cu ion removal (yielding apo-Az) with  $E_a = 320$  meV (33 kJ/mol). Although  $E_a$  for ETp via deuterated Az is much lower than via apo-Az, the change to thermal activation is remarkable, because the deuterated protein still contains the Cu redox center.

A possible explanation for how deuteration can change ETp  $> 180$  K to temperature dependent is based on the fact that activationless ET may be observed if the potential energy curve of the acceptor crosses that of the donor at the latter's minimum energy. Then the reorganization energy of the process,  $\lambda$ , equals the ET driving force,  $-\Delta G^0$ , and the  $k_{ET}$  is maximal (2). In such a case even a minor shift of the nuclear potential curves by the H/D exchange (3) will move the crossing point and lead to a thermally activated barrier for transport, as observed in our measurements.

1. Sepunaru L, Pecht I, Sheves M, Cahen D (2011) Solid-state electron transport across azurin: From a temperature-independent to a temperature-activated mechanism. *J Am Chem Soc* 133(8):2421–2423.
2. Marcus RA, Sutin N (1985) Electron transfers in chemistry and biology. *Biochim Biophys Acta* 811(3):265–322.

3. Kavner A, Bonet F, Shahar A, Simon J, Young E (2005) The isotopic effects of electron transfer: An explanation for Fe isotope fractionation in nature. *Geochim Cosmochim Acta* 69(12):2971–2979.



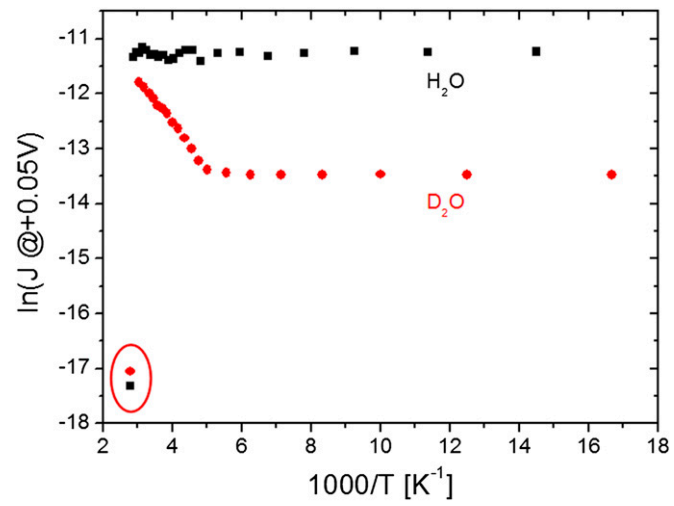

Fig. S2. Current density at  $-50$  mV vs. inverse temperature of protium- and deuterium-labeled Az with an Au pad as top contact (i.e., by lift-off, float-on technique). The red circle indicates the denaturation point of the protein.
